# Supplementary material
Source: Copernicus journal article supplement (doi:10.5194/bg-23-2985-2026)
Supplement: Supplementary file 1 [file bg-23-2985-2026-supplement.pdf]

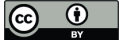

*Supplement of*

## **Drivers of drought-induced canopy mortality in conifer and broadleaf forests across Luxembourg**

**Selina Schwarz et al.**

*Correspondence to:* Nadine K. Ruehr ([nadine.ruehr@kit.edu](mailto:nadine.ruehr@kit.edu))

The copyright of individual parts of the supplement might differ from the article licence.

## Supplementary Material

### Tables

*Table S1: Summary of the geospatial datasets used in this study, including orthophotos (2017–2020), LiDAR-derived elevation models (DTM and DSM), land cover data, and soil type information, with corresponding sources, sensor types, spatial resolution, and acquisition periods.*

| Data                        | Source                                                                                                                                                                                                                                                                                            | Sensor Type                    | Resolution | Acquisition date/year                                                              |
|-----------------------------|---------------------------------------------------------------------------------------------------------------------------------------------------------------------------------------------------------------------------------------------------------------------------------------------------|--------------------------------|------------|------------------------------------------------------------------------------------|
| Orthophoto 2017             | <a href="https://data.public.lu/en/datasets/orthophoto-officielle-du-grand-duche-de-luxembourg-edition-2017/">https://data.public.lu/en/datasets/orthophoto-officielle-du-grand-duche-de-luxembourg-edition-2017/</a>                                                                             | Optical RGB                    | 20 cm      | 14 June 2017;<br>19–20 June 2017                                                   |
| Orthophoto 2019             | <a href="https://data.public.lu/en/datasets/orthophoto-officielle-du-grand-duche-de-luxembourg-edition-2019/">https://data.public.lu/en/datasets/orthophoto-officielle-du-grand-duche-de-luxembourg-edition-2019/</a>                                                                             | Optical RGB                    | 20 cm      | 4–5 July 2019;<br>22 August 2019                                                   |
| Orthophoto 2020             | <a href="https://data.public.lu/en/datasets/orthophoto-officielle-du-grand-duche-de-luxembourg-edition-2020/">https://data.public.lu/en/datasets/orthophoto-officielle-du-grand-duche-de-luxembourg-edition-2020/</a>                                                                             | Optical RGB                    | 20 cm      | 30–31 July 2020;<br>5–7 August 2020;<br>13–15 September 2020;<br>19 September 2020 |
| Digital Terrain Model (DTM) | <a href="https://data.public.lu/en/datasets/digital-terrain-model-high-dem-resolution/">https://data.public.lu/en/datasets/digital-terrain-model-high-dem-resolution/</a>                                                                                                                         | LiDAR                          | 50 cm      | October 2017                                                                       |
| Digital Surface Model (DSM) | <a href="https://data.public.lu/en/datasets/digital-surface-model-high-dem-resolution/">https://data.public.lu/en/datasets/digital-surface-model-high-dem-resolution/</a>                                                                                                                         | LiDAR                          | 50 cm      | October 2017                                                                       |
| Lis-L Land Cover Data       | <a href="https://data.public.lu/en/datasets/inspire-annex-ii-theme-land-cover-landcoversurfaces-land-information-system-for-luxembourg-lis-l-2018/">https://data.public.lu/en/datasets/inspire-annex-ii-theme-land-cover-landcoversurfaces-land-information-system-for-luxembourg-lis-l-2018/</a> | Optical RGB, LiDAR, Sentinel-2 | 20 cm      | 2018                                                                               |
| Soil Type                   | <a href="https://data.public.lu/en/datasets/inspire-annex-iii-soil-soil-map-1-100-000/">https://data.public.lu/en/datasets/inspire-annex-iii-soil-soil-map-1-100-000/</a>                                                                                                                         | -                              | 1:100,000  | 1969                                                                               |

*Table S2: Soil type classes with corresponding drainage and soil moisture characteristics (ASTA, 2020). Soil drainage ranges from very poorly to excessively draining soils, resulting in very dry to very moist soils. No soil drainage or moisture data was available for seepage areas. All soil characteristics were translated from the French original.*

| Soil type                                                                                | Soil drainage        | Soil moisture                 |
|------------------------------------------------------------------------------------------|----------------------|-------------------------------|
| Slightly stony loamy soils, non-gleyed to moderately gleyed, with a structural B horizon | imperfect to perfect | dry to moderately moist soils |
| Loamy-stony soils with schisto-phylladic content,                                        | perfect              | dry soils                     |

|                                                                                                                                                    |                        |                                          |
|----------------------------------------------------------------------------------------------------------------------------------------------------|------------------------|------------------------------------------|
| non-gleyed, structural B horizon                                                                                                                   |                        |                                          |
| Loamy-stony soils with weathered schisto-phylladic content, non-gleyed, structural B horizon                                                       | perfect                | dry soils                                |
| Loamy-stony soils with schisto-phylladic content, slightly to moderately gleyed, structural B horizon                                              | imperfect to moderate  | moderately dry to moderately moist soils |
| Loamy-stony soils with schisto-sandy content, non-gleyed, structural B horizon                                                                     | perfect to excessive   | very dry to dry soils                    |
| Loamy-stony soils with weathered schisto-sandy content, non-gleyed, structural B horizon                                                           | perfect to excessive   | very dry to dry soils                    |
| Loamy-stony soils with schisto-sandy content, slightly to moderately gleyed, structural B horizon                                                  | imperfect to excessive | very dry to moderately moist soils       |
| Loamy-stony soils with clayey-schisto-sandy content, slightly to moderately gleyed, structural B horizon                                           | imperfect to moderate  | moderately dry to moderately moist soils |
| Loamy-stony soils with schist content, non-gleyed, structural B horizon                                                                            | perfect                | dry soils                                |
| Loamy- and clayey-stony soils with quartzite pebbles, non-gleyed to moderately gleyed, structural or textural B horizon                            | imperfect to perfect   | dry to moderately moist soils            |
| Clayey-stony soils with dolomitic content, non-gleyed, structural B horizon                                                                        | imperfect to perfect   | dry to moderately moist soils            |
| Clayey-stony soils with calcareous content, non-gleyed, structural B horizon                                                                       | perfect                | dry soils                                |
| Sandy, loamy-sandy, and sandy-loamy soils, non-gleyed, structural or textural B horizon, on limestone sandstone, sand, or weathered clay substrate | perfect                | dry soils                                |
| Sandy, loamy-sandy, and sandy-loamy soils, slightly to moderately gleyed, textural B horizon, on clay substrate                                    | imperfect to excessive | very dry to moderately moist soils       |
| Sandy-loamy and sandy-clayey soils, non-gleyed, structural or                                                                                      | perfect                | dry soils                                |

|                                                                                                                                   |                                                     |                                          |
|-----------------------------------------------------------------------------------------------------------------------------------|-----------------------------------------------------|------------------------------------------|
| textural B horizon, on variegated sandstone substrate                                                                             |                                                     |                                          |
| Sandy-loamy and loamy soils, non-gleyed to moderately gleyed, textural B horizon                                                  | imperfect to perfect                                | dry to moderately moist soils            |
| Sandy-loamy and loamy soils, strongly to very strongly gleyed, textural B horizon                                                 | poor to fairly poor, without reduced horizon        | moist to very moist soils                |
| Clayey and heavy clayey soils, non-gleyed, structural or textural B horizon, on limestone substrate                               | perfect                                             | dry soils                                |
| Clayey soils, non-gleyed, structural or textural B horizon, on macigno substrate                                                  | imperfect to perfect                                | dry soils                                |
| Clayey soils, slightly to moderately gleyed, textural B horizon, on macigno substrate                                             | imperfect to moderate                               | moderately dry to moderately moist soils |
| Clayey soils, slightly to moderately gleyed, textural B horizon, on clay substrate                                                | imperfect                                           | moderately moist soils                   |
| Clayey soils, non-gleyed to moderately gleyed, textural B horizon, on shelly sandstone substrate                                  | imperfect to perfect                                | dry to moderately moist soils            |
| Clayey and heavy clayey soils, non-gleyed to moderately gleyed, structural or textural B horizon, on marl and limestone substrate | imperfect to perfect                                | dry to moderately moist soils            |
| Clayey and heavy clayey soils, non-gleyed, structural B horizon, on marl substrate                                                | perfect                                             | dry soils                                |
| Heavy clayey soils, slightly to very strongly gleyed, structural or textural B horizon, on marl substrate                         | poor to moderate, without reduced horizon           | moderately dry to very moist soils       |
| Colluvium and Alluvium                                                                                                            | poor to imperfect, with and without reduced horizon | moderately dry to very moist soils       |
| Seepage areas                                                                                                                     | -                                                   | -                                        |

## Figures

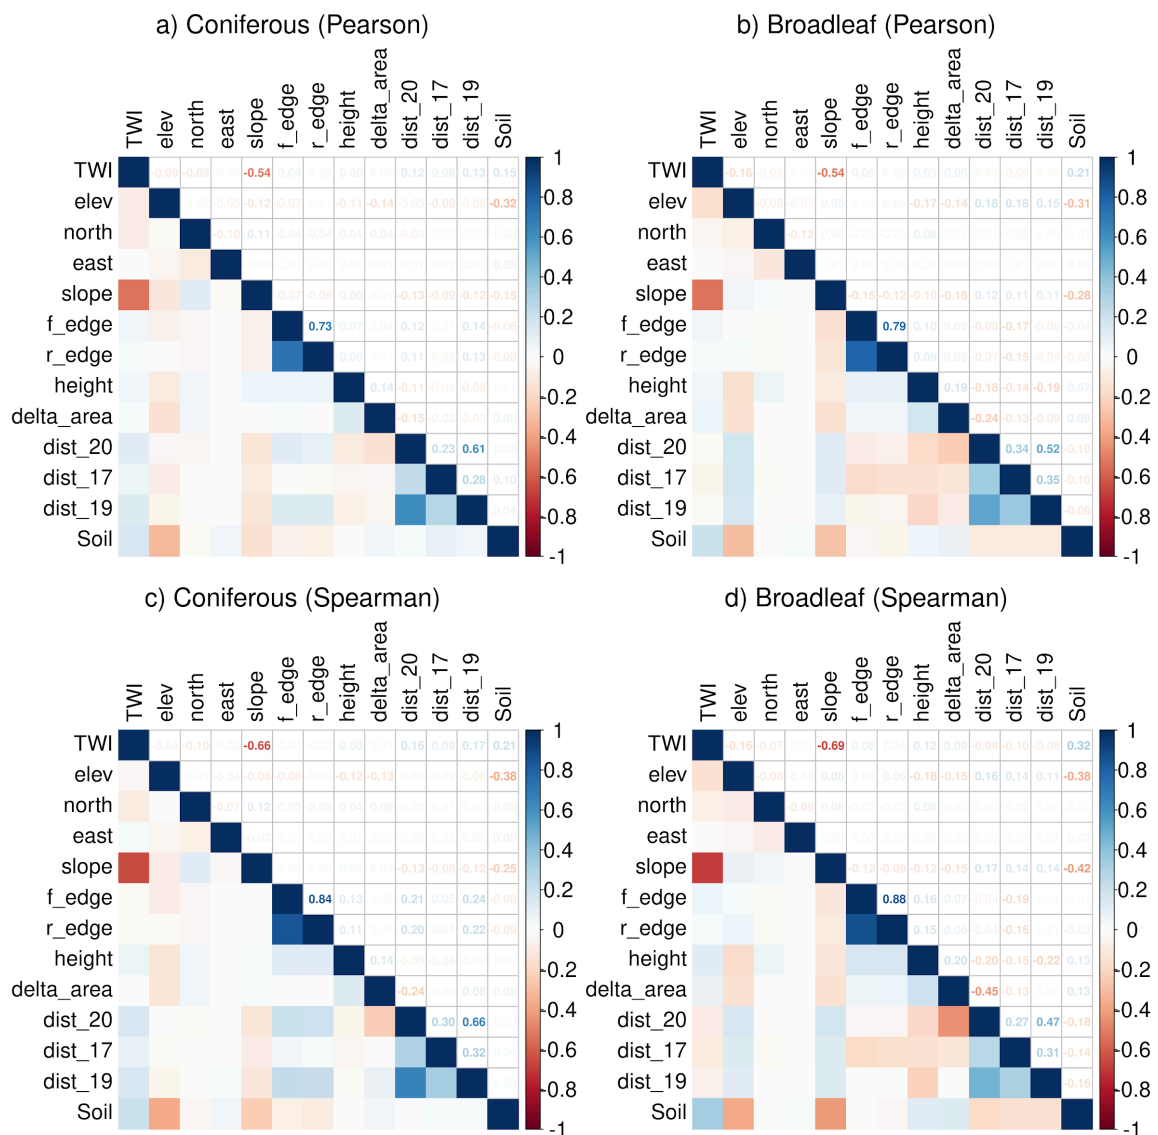

Figure S1: Pearson and Spearman correlation matrices of predictors for coniferous and broadleaf models. The matrices highlight both linear (Pearson) and monotonic (Spearman) relationships between predictors, providing insight into multicollinearity and potential interactions. Shown are correlation matrices for coniferous (left column) and broadleaf (right column) models. The top row depicts Pearson correlation coefficients, while the bottom row displays Spearman rank correlations. Color intensity indicates the strength and direction of correlations, with positive correlations shown in blue and negative correlations in red. Numeric values are overlaid on the upper triangle of each matrix for easier interpretation.
